# Supplementary material for: Metabolomic Study on Idiosyncratic Liver Injury Induced by Different Extracts of Polygonum multiflorum in Rats Integrated with Pattern Recognition and Enriched Pathways Analysis
Source: PubMed Central journal article supplement (PMC5156827; doi:10.3389/fphar.2016.00483), 2016-12-15
Supplement: Presentation_1.pdf [file Presentation_1.pdf]

*Supplementary materials for:*

**Metabolomic study on idiosyncratic liver injury induced by  
different extracts of *Polygonum multiflorum* in rats integrated  
with pattern recognition and enriched pathways analysis**

Chun-yu Li<sup>1,2‡</sup>, Can Tu<sup>2,4‡</sup>, Dan Gao<sup>1,2‡</sup>, Rui-lin Wang<sup>3</sup>, Hai-zhu Zhang<sup>2,4</sup>, Ming Niu<sup>2</sup>, Rui-yu Li<sup>2</sup>, Cong-en Zhang<sup>2</sup>, Rui-sheng Li<sup>5</sup>, Xiao-he Xiao, Mei-hua Yang<sup>1\*</sup>, Jia-bo Wang<sup>2\*</sup>

<sup>1</sup> Institute of Medicinal Plant Development, Chinese Academy of Medical Sciences & Peking Union Medical College, China, <sup>2</sup> China Military Institute of Chinese Medicine, 302 Military Hospital, China, <sup>3</sup> Integrative Medical Center, 302 Military Hospital, China, <sup>4</sup> School of Pharmacy, Chengdu University of Traditional Chinese Medicine, China, <sup>5</sup> Research Center for Clinical and Translational Medicine, 302 Hospital of People's Liberation Army, China.

## 1. Chemical compositions determination of the different extracts of *Polygonum multiflorum*

The main constituents in the CHCl<sub>3</sub>, EtOAc and Residue extracts of *Polygonum multiflorum* used in the experiment were analyzed by UHPLC. The sample was filtered through a syringe filter (0.22 μm) and transferred into the sampling vial pending UHPLC analysis that were performed on a Agilent Acquity ultraperformance liquid chromatography system with column oven temperature maintained at 30 °C, using an ZORBA×300 SB-C18 column (2.1 mm×100 mm i.d., 1.7 μm particle size) (Agilent, USA). UV detection was performed at 280 nm. The mobile phase was constituted by solvent A (0.1% formic acid in water) and solvent B (acetonitrile). The flow rate was 0.2 mL min<sup>-1</sup> with a linear gradient at the following conditions: 0~5 min, 5% B; 5~6 min, 32%~55% B; 6~12 min, 55~85% B; 12~13 min, 85%~90% B; 13~15 min, 90% B. The injection volume was 3 μL.

The 2,3,5,4'-tetrahydroxystilbene-2-O-β-D-glucopyranoside (TSG), emodin-8-O-β-D-glucopyranoside and emodin reference substances were provided by the Chengdu Chroma-Biotechnology Co., Ltd and the purity of all these compounds were higher than 98.0%. **FIGURE S1 A** shows the chromatogram of 2,3,5,4'-tetrahydroxystilbene-2-O-β-D-glucopyranoside, emodin-8-O-β-D-glucopyranoside and emodin standard mixture. **FIGURE S1 B, C and D** show the UHPLC profile of EtOAc, CHCl<sub>3</sub> and Residue extract, respectively. The results of chromatography analysis showed that the major chemical compositions of EtOAc extract were stilbenes (TSG), the other was slight emodin-8-O-β-D-glucopyranoside. In addition, anthranoid derivatives, such as emodin, were mainly contained in CHCl<sub>3</sub> extract. And the RE extract contained neither anthraquinones nor stilbenes.

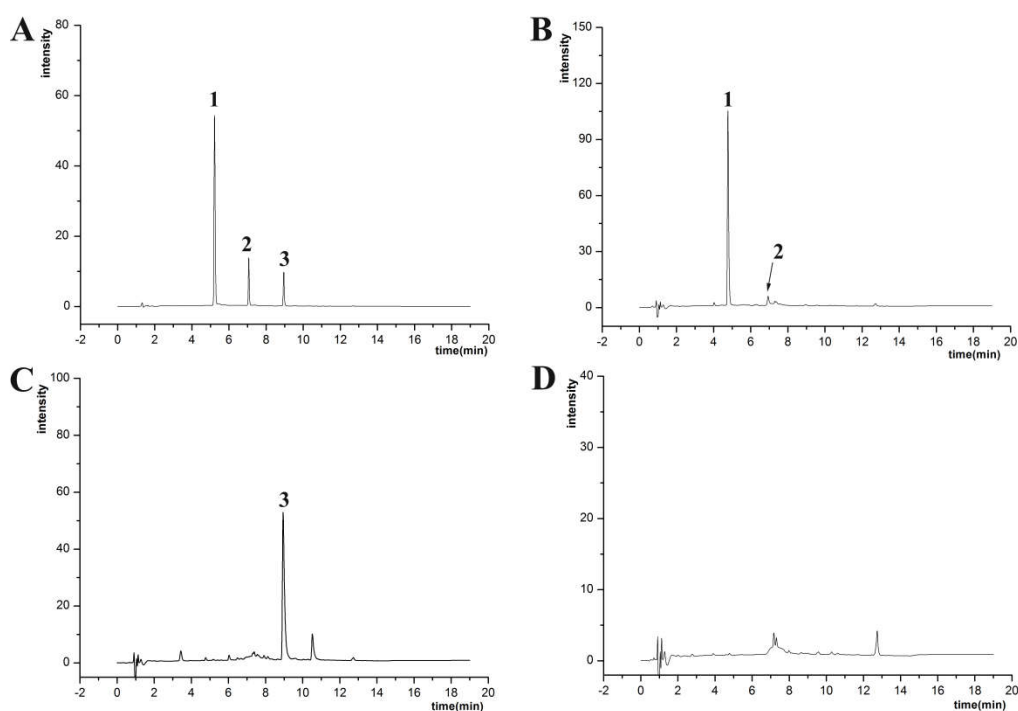

**FIGURE S 1** Ultra-high performance liquid chromatography of different extracts of *Polygonum multiflorum*. (A) Chromatogram of 2,3,5,4'-tetrahydroxystilbene-2-O- $\beta$ -D-glucopyranoside, emodin-8-O- $\beta$ -D-glucopyranoside and emodin standard mixture. (B)UHPLC profile of EtOAc extract. (C) UHPLC profile of CHCl<sub>3</sub> extract. (D) UHPLC profile of Residue extract. 1. 2,3,5,4'-tetrahydroxystilbene-2-O- $\beta$ -D- glucopyranoside;2. emodin-8-O- $\beta$ -D-glucopyranoside; 3. emodin

## 2. Parameters of PCA, heatmap and OPLS-DA models and the results of OPLS-DA analysis based on data derived from ESI+ mode

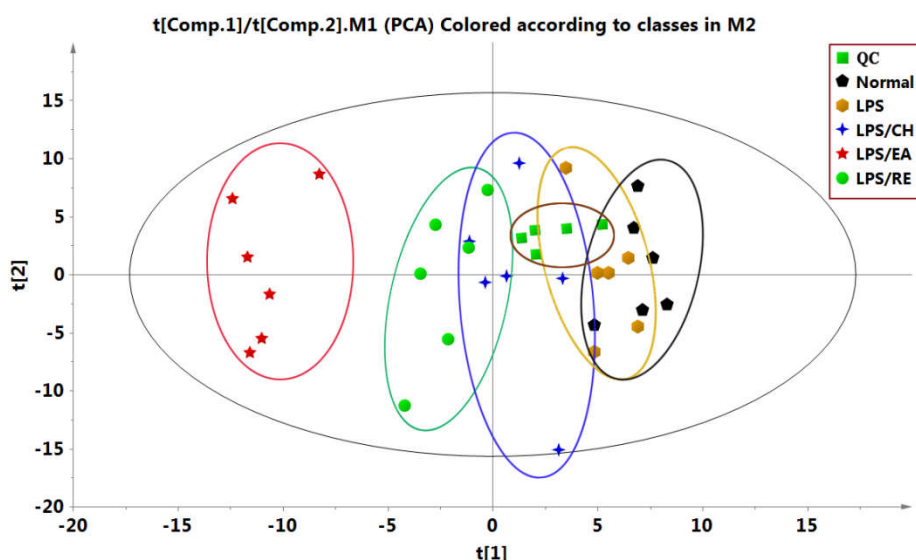

**FIGURE S2** PCA score plots of different extracts of *Polygonum multiflorum* by UPLC-HDMS in positive ESI mode.

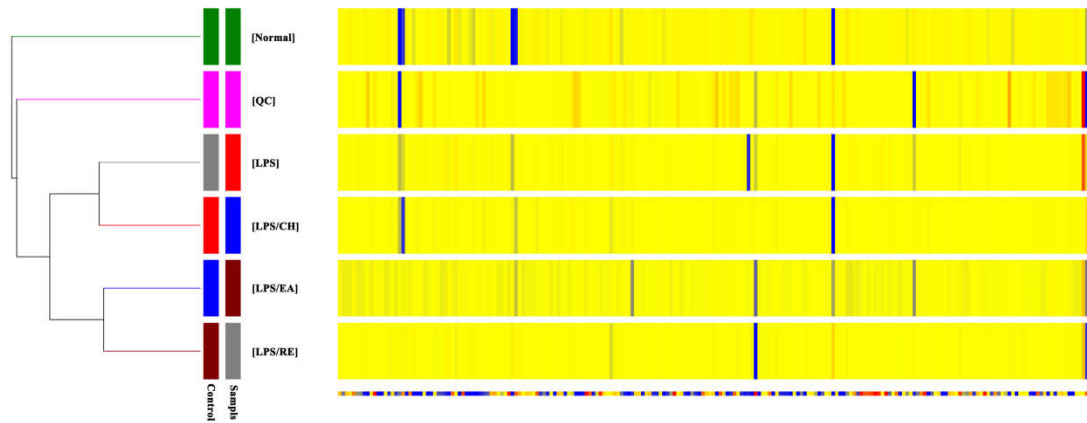

**FIGURE S3** Heatmap visualization for different extracts of *Polygonum multiflorum*. Rows: samples; Columns: metabolites(ESI+ mode)

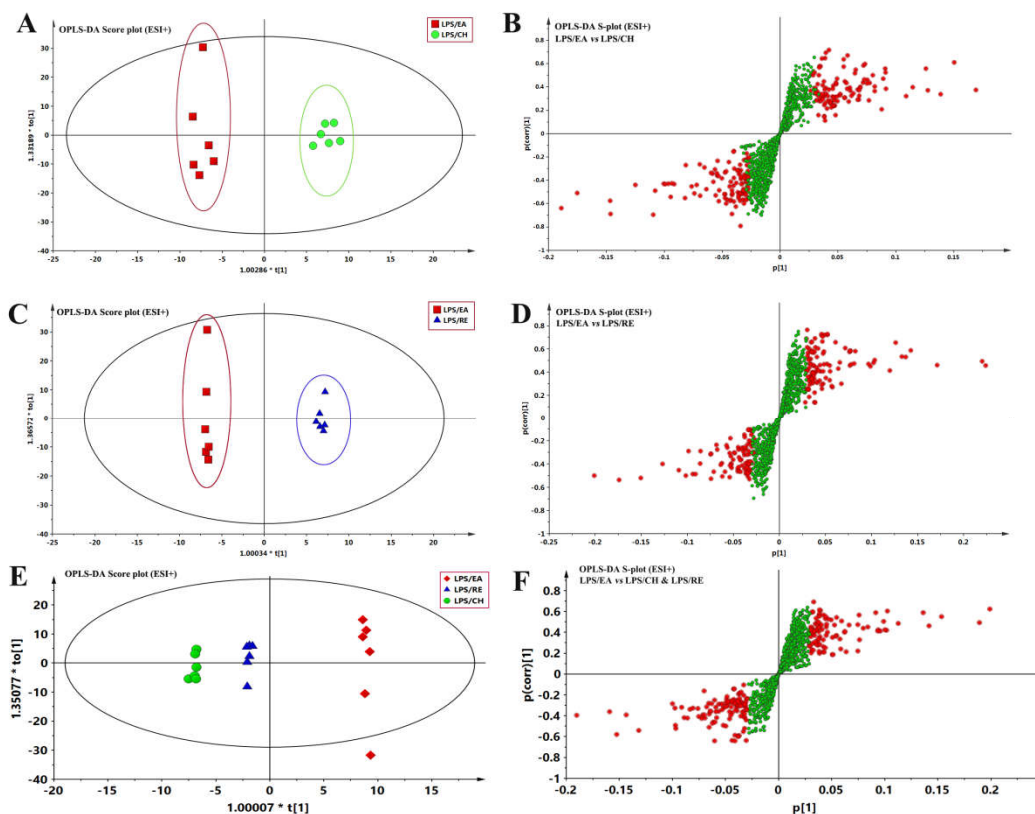

**FIGURE S4** OPLS-DA analysis of the data generated from the ESI+ mode. S-score plots constructed from the supervised OPLS analysis of serum(B,D and F), the axes that are plotted in the S-plot from the predictive component are  $p_1$  vs  $p(\text{corr})_1$ , representing the magnitude and reliability respectively. Metabolite ions with VIP value  $>1$  were marked with a red square. (A, B) displays the result of OPLS-DA model (M2) using the data from the LPS/EA and LPS/CH groups in ~~ESI-~~ mode, (C, D) displays the result of OPLS-DA model (M3) using the data from the LPS/EA and LPS/RE groups in ~~ESI-~~ mode, (E, F) displays the result of OPLS-DA model (M4) using the data from the LPS/EA , LPS/CH and LPS/RE groups in ESI+ mode.

### 3. Pathway analysis of potential marker metabolites for different extracts of *Polygonum multiflorum* treatment

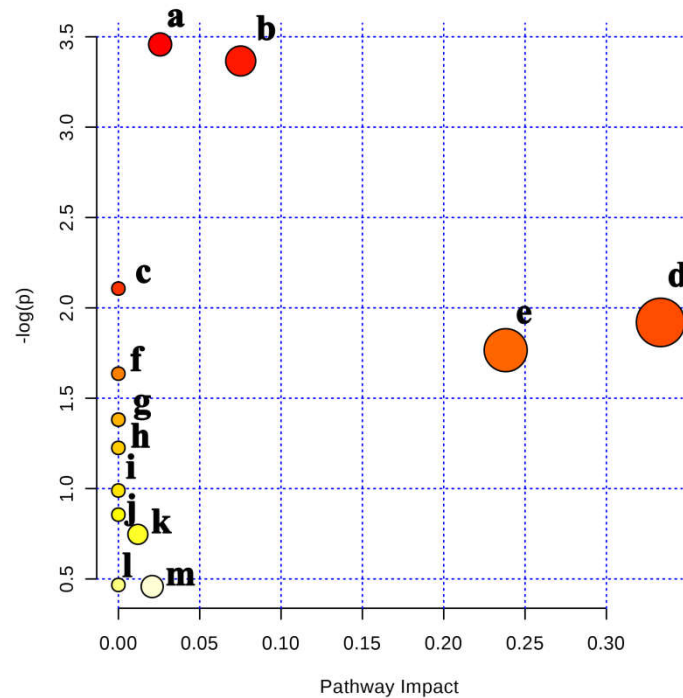

**Figure S5** Summary of pathway analysis with MetaboAnalyst 3.0. a, Citrate cycle (TCA cycle); b, Sphingolipid metabolism; c, Vitamin B6 metabolism; d, Valine, leucine and isoleucine biosynthesis; e, Nicotinate and nicotinamide metabolism; f, Pantothenate and CoA biosynthesis; g, Propanoate metabolism; h, Butanoate metabolism; i, Alanine, aspartate and glutamate metabolism; j, Glycine, serine and threonine metabolism; k, Valine, leucine and isoleucine degradation; l, Arginine and proline metabolism; m, Purine metabolism

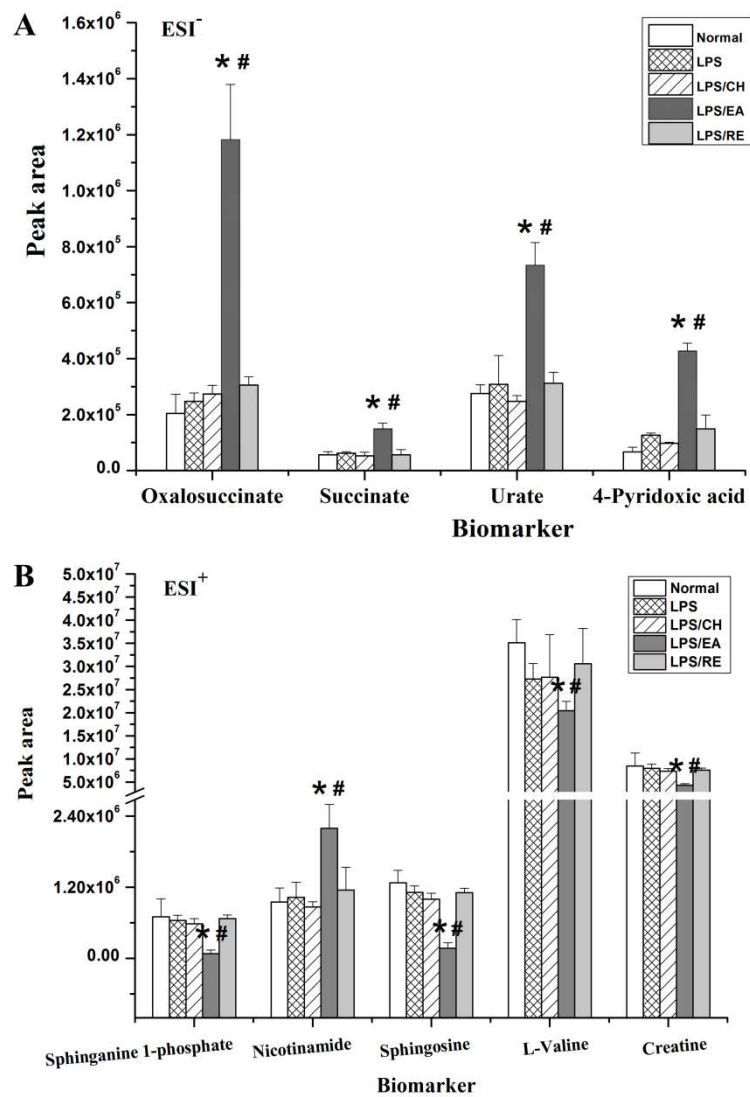

**Figure S6** Graphical representation of potential markers among the Normal, LPS, LPS/EA , LPS/CH and LPS/RE groups. (A) In negative ion mode, (B) in positive ion mode. Bars in the Fig. represent the mean relative metabolite concentration and standard deviations. Compared with the LPS/CH group, \* represents  $p < 0.05$ ; Compared with the LPS/RE group, # represents  $p < 0.05$ .

**Table S1.** Parameters of PCA and OPLS-DA models

| Model                                                | No. <sup>b</sup> | R <sup>2</sup> X <sub>cum</sub> <sup>a</sup> | R <sup>2</sup> Y <sub>cum</sub> <sup>a</sup> | Q <sup>2</sup> Y <sub>cum</sub> <sup>a</sup> |
|------------------------------------------------------|------------------|----------------------------------------------|----------------------------------------------|----------------------------------------------|
| PCA (ESI <sup>-</sup> )                              | 7                | 0.705                                        | —                                            | 0.527                                        |
| PCA (ESI <sup>+</sup> )                              | 8                | 0.803                                        | —                                            | 0.579                                        |
| OPLS-DA (ESI <sup>-</sup> ) LPS/EA vs LPS/CH         | 3                | 0.586                                        | 0.990                                        | 0.661                                        |
| OPLS-DA (ESI <sup>-</sup> ) LPS/EA vs LPS/RE         | 2                | 0.631                                        | 0.996                                        | 0.503                                        |
| OPLS-DA (ESI <sup>-</sup> ) LPS/EA vs LPS/CH& LPS/RE | 4                | 0.606                                        | 0.812                                        | 0.502                                        |
| OPLS-DA (ESI <sup>+</sup> ) LPS/EA vs LPS/CH         | 3                | 0.689                                        | 0.991                                        | 0.79                                         |
| OPLS-DA (ESI <sup>+</sup> ) LPS/EA vs LPS/RE         | 3                | 0.623                                        | 0.927                                        | 0.553                                        |
| OPLS-DA (ESI <sup>+</sup> ) LPS/EA vs LPS/CH& LPS/RE | 6                | 0.772                                        | 0.867                                        | 0.537                                        |

<sup>a</sup> R<sup>2</sup>X<sub>cum</sub> and R<sup>2</sup>Y<sub>cum</sub> are the cumulative modeled variation in X and Y matrix, respectively. Q<sup>2</sup>Y<sub>cum</sub> is

the cumulative predicted variation in Y matrix.

<sup>b</sup> Number of components.

**Table S2 Result from pathway analysis with MetaboAnalyst 3.0**

Table S2 Result from pathway analysis with MetaboAnalyst 3.0

| Pathway name                                | Total | Hits | Raw <i>p</i> | -log( <i>p</i> ) | FDR  | Impact |
|---------------------------------------------|-------|------|--------------|------------------|------|--------|
| Citrate cycle (TCA cycle)                   | 20    | 2    | 0.0315       | 3.4576           | 1.00 | 0.03   |
| Sphingolipid metabolism                     | 21    | 2    | 0.0345       | 3.3660           | 1.00 | 0.08   |
| Vitamin B6 metabolism                       | 9     | 1    | 0.1216       | 2.1068           | 1.00 | 0.00   |
| Valine, leucine and isoleucine biosynthesis | 11    | 1    | 0.1467       | 1.9195           | 1.00 | 0.33   |
| Nicotinate and nicotinamide metabolism      | 13    | 1    | 0.1711       | 1.7658           | 1.00 | 0.24   |
| Pantothenate and CoA biosynthesis           | 15    | 1    | 0.1948       | 1.6360           | 1.00 | 0.00   |
| Propanoate metabolism                       | 20    | 1    | 0.2512       | 1.3813           | 1.00 | 0.00   |
| Butanoate metabolism                        | 20    | 1    | 0.2512       | 1.3813           | 1.00 | 0.00   |
| Alanine, aspartate and glutamate metabolism | 24    | 1    | 0.2937       | 1.2252           | 1.00 | 0.00   |
| Glycine, serine and threonine metabolism    | 32    | 1    | 0.3719       | 0.9893           | 1.00 | 0.00   |
| Valine, leucine and isoleucine degradation  | 38    | 1    | 0.4250       | 0.8557           | 1.00 | 0.00   |
| Arginine and proline metabolism             | 44    | 1    | 0.4739       | 0.7469           | 1.00 | 0.01   |
| Purine metabolism                           | 68    | 1    | 0.6326       | 0.4579           | 1.00 | 0.02   |

Total is the total number of compounds in the pathway; the Hits is the actually matched number from the user uploaded data; the Raw *p* is the original *p* value calculated from the enrichment analysis; the FDR *p* is the *p* value adjusted using False Discovery Rate; the Impact is the pathway impact value calculated from pathway topology analysis.
